# Supplementary material for: Major cardiac events for adult survivors of childhood cancer diagnosed between 1970 and 1999: report from the Childhood Cancer Survivor Study cohort
Source: PubMed Central journal article supplement — BMJ. 2020 Jan 15;368:l6794. doi: 10.1136/bmj.l6794 (PMC7190022; doi:10.1136/bmj.l6794), 2020-01-15
Supplement: muld050796.wf1.pdf [file muld050796.wf1.pdf]

**Supplemental Figure 1. Number of cardiac conditions reported by CCSS participants**

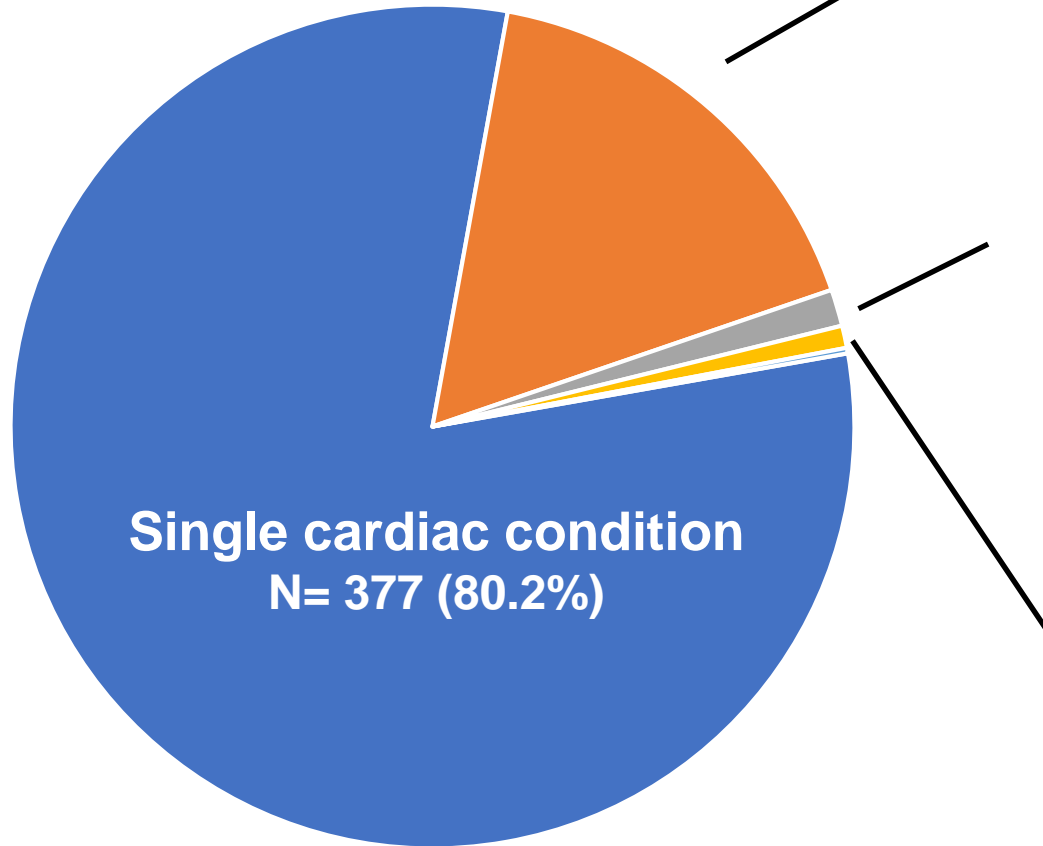

**Survivors Reporting Two Cardiac Conditions = 79 (16.8%)**

|                       | Heart Failure<br>(N=65) | CAD<br>(N=56) | Valvular<br>(N=9) | Pericardial<br>(N=5) | Arrhythmia<br>(N=23) |
|-----------------------|-------------------------|---------------|-------------------|----------------------|----------------------|
| 1 <sup>st</sup> Event | 21                      | 8             |                   | 1                    | 3                    |
| 2 <sup>nd</sup> Event | 8                       | 14            | 3                 |                      | 8                    |
| Synchronous           | 36                      | 34            | 6                 | 4                    | 12                   |

**Survivors Reporting Three Cardiac Conditions = 9 (1.4%)**

|                       | Heart Failure<br>(N=9) | CAD<br>(N=7) | Valvular<br>(N=3) | Pericardial<br>(N=0) | Arrhythmia<br>(N=7) |
|-----------------------|------------------------|--------------|-------------------|----------------------|---------------------|
| 1 <sup>st</sup> Event | 3                      | 1            | 1                 |                      |                     |
| 2 <sup>nd</sup> Event | 2                      | 2            | 2                 |                      | 1                   |
| 3 <sup>rd</sup> Event |                        |              |                   |                      | 3                   |
| Synchronous           | 4                      | 4            | 1                 |                      | 3                   |

**Survivors Reporting Four Cardiac Conditions = 4 (0.85%)**

|                       | Heart Failure<br>(N=4) | CAD<br>(N=3) | Valvular<br>(N=3) | Pericardial<br>(N=2) | Arrhythmia<br>(N=4) |
|-----------------------|------------------------|--------------|-------------------|----------------------|---------------------|
| 1 <sup>st</sup> Event | 4                      | 1            |                   |                      | 1                   |
| 2 <sup>nd</sup> Event |                        | 2            | 2                 |                      |                     |
| 3 <sup>rd</sup> Event |                        |              |                   | 2                    | 2                   |
| 4 <sup>th</sup> Event |                        |              | 1                 |                      | 1                   |
| Synchronous           | 1                      | 1            |                   | 2                    | 3                   |

**1 (0.69%) participant reported being diagnosed with all 5 cardiac conditions**
