# Supplementary material for: Major cardiac events for adult survivors of childhood cancer diagnosed between 1970 and 1999: report from the Childhood Cancer Survivor Study cohort
Source: PubMed Central journal article supplement — BMJ. 2020 Jan 15;368:l6794. doi: 10.1136/bmj.l6794 (PMC7190022; doi:10.1136/bmj.l6794), 2020-01-15
Supplement: muld050796.ww1.pdf [file muld050796.ww1.pdf]

**Supplemental Table 1. Cardiac Conditions per Common Terminology Criteria for Adverse Events (v4.03)  
Grade**

| <b>Grade</b>         | <b>Heart Failure</b>                      | <b>Coronary artery disease</b>                                                                       | <b>Valvular heart disease</b>     | <b>Pericardial disease</b>                          | <b>Arrhythmia</b>                                              |
|----------------------|-------------------------------------------|------------------------------------------------------------------------------------------------------|-----------------------------------|-----------------------------------------------------|----------------------------------------------------------------|
| 3 (Severe/disabling) | Cardiomyopathy or HF requiring medication | MI, angina, coronary heart disease not requiring heart catheterization but on antianginal medication | None                              | Pericardial disease requiring surgical intervention | Arrhythmia requiring pacemaker                                 |
| 4 (Life-threatening) | Cardiac transplantation                   | MI requiring catheterization/PTCA, or CABG                                                           | Valve replacement                 | N/A                                                 | <u>Cardioversion</u> ,<br>Ventricular fibrillation/<br>flutter |
| 5 (Death)            | Death from heart failure                  | Death from MI, ischemic heart disease, or atherosclerosis                                            | Death from valvular heart disease | Death from pericardial disease                      | Death from arrhythmia                                          |

HF=heart failure, MI=myocardial infarction, PTCA=percutaneous transluminal coronary angioplasty, CABG=coronary artery bypass graft  
N/A=not applicable

**Supplemental Table 2. Characteristics of participating CCSS survivors vs. non-participants**

|                                             | Participants               |                      |                      |                      | Total<br>N=12,187<br>N (%) | Non-participants     |                      |                      | (p) <sup>‡</sup> |        |
|---------------------------------------------|----------------------------|----------------------|----------------------|----------------------|----------------------------|----------------------|----------------------|----------------------|------------------|--------|
|                                             | Overall cohort<br>N=23,462 | 1970-1979<br>N=6,193 | 1980-1989<br>N=9,363 | 1990-1999<br>N=7,906 |                            | 1970-1979<br>N=3,735 | 1980-1989<br>N=4,367 | 1990-1999<br>N=3,918 |                  |        |
|                                             | N (%)                      | N (%) <sup>*</sup>   | N (%) <sup>*</sup>   | N (%) <sup>*</sup>   |                            | N (%) <sup>*</sup>   | N (%) <sup>*</sup>   | N (%) <sup>*</sup>   |                  |        |
| <b>Gender</b>                               |                            |                      |                      |                      |                            |                      |                      |                      |                  |        |
| Female                                      | 10,874 (46.3)              | 2,883 (46.6)         | 4,292 (45.9)         | 3,699 (46.4)         | 4,874 (39.9)               | 1,577 (42.2)         | 1,797 (40.6)         | 1,485 (37.5)         | <0.001           |        |
| Male                                        | 12,588 (53.7)              | 3,310 (53.4)         | 5,071 (54.1)         | 4,207 (53.6)         | 7,186 (60.1)               | 2,158 (57.8)         | 2,570 (59.4)         | 2,433 (62.5)         |                  |        |
| <b>Age at diagnosis (years)</b>             |                            |                      |                      |                      |                            |                      |                      |                      |                  |        |
| Median (range)                              | 6.1<br>(0.0-20.9)          | 7.2<br>(0.0-20.9)    | 5.9<br>(0.0-20.9)    | 5.9<br>(0.00-20.9)   | 6.8<br>(0.0-20.9)          | 7.6<br>(0.0-20.9)    | 7.0<br>(0.0-20.9)    | 6.0<br>(0.0-20.9)    | <0.001           |        |
| <b>Diagnosis</b>                            |                            |                      |                      |                      |                            |                      |                      |                      |                  |        |
| Leukemia                                    | 7,281 (39.5)               | 2,023 (32.7)         | 3,314 (40.1)         | 1,944 (43.0)         | 3,086 (32.8)               | 988 (26.5)           | 1,227 (33.1)         | 845 (37.9)           | <0.001           |        |
| ALL**                                       | 6,127 (35.2)               | 1,818 (29.4)         | 2,885 (35.9)         | 1,424 (38.0)         | 2,424 (28.1)               | 834 (22.3)           | 1,006 (28.4)         | 584 (32.6)           |                  |        |
| AML <sup>‡</sup>                            | 852 (3.2)                  | 131 (2.1)            | 324 (3.1)            | 397 (3.8)            | 397 (3.0)                  | 70 (1.9)             | 122 (2.6)            | 205 (4.2)            |                  |        |
| Other                                       | 302 (1.1)                  | 74 (1.19)            | 105 (1.0)            | 123 (1.2)            | 239 (1.8)                  | 84 (2.3)             | 99 (2.1)             | 56 (1.1)             |                  |        |
| Brain cancer                                | 4,227 (15.8)               | 735 (11.9)           | 1,498 (14.8)         | 1,994 (19.1)         | 2,377 (17.6)               | 490 (13.1)           | 825 (17.6)           | 998 (20.2)           |                  |        |
| Astrocytoma                                 | 2,589 (9.7)                | 509 (8.2)            | 944 (9.4)            | 1,136 (10.9)         | 1,415 (10.5)               | 315 (8.4)            | 481 (10.3)           | 619 (12.5)           |                  |        |
| Medulloblastoma                             | 994 (3.7)                  | 147 (2.4)            | 348 (3.4)            | 499 (4.8)            | 428 (3.2)                  | 81 (2.2)             | 159 (3.4)            | 188 (3.8)            |                  |        |
| Other                                       | 644 (2.4)                  | 79 (1.3)             | 206 (2.0)            | 359 (3.4)            | 470 (3.5)                  | 94 (2.5)             | 185 (4.0)            | 191 (3.9)            |                  |        |
| Lymphoma                                    | 4,904 (18.3)               | 1,545 (25.0)         | 1,820 (18.0)         | 1,539 (14.7)         | 2,417 (17.9)               | 776 (20.8)           | 771 (16.4)           | 838 (16.9)           |                  |        |
| HL <sup>†</sup>                             | 2,985 (11.2)               | 1,093 (17.7)         | 1,053 (10.4)         | 839 (8.0)            | 1,426 (10.6)               | 514 (13.8)           | 426 (9.1)            | 467 (9.4)            |                  |        |
| NHL <sup>‡</sup>                            | 1,919 (7.2)                | 452 (7.3)            | 767 (7.6)            | 700 (6.7)            | 991 (7.4)                  | 262 (7.0)            | 345 (7.4)            | 371 (7.5)            |                  |        |
| Kidney tumor                                | 2,130 (8.0)                | 531 (8.6)            | 870 (8.6)            | 729 (7.0)            | 970 (7.2)                  | 289 (7.7)            | 309 (6.6)            | 360 (7.3)            |                  |        |
| Neuroblastoma                               | 1,825 (6.8)                | 441 (7.1)            | 668 (6.6)            | 716 (6.9)            | 882 (6.5)                  | 245 (6.6)            | 274 (5.8)            | 344 (7.0)            |                  |        |
| Soft tissue sarcoma                         | 1,153 (4.3)                | 364 (5.9)            | 443 (4.4)            | 346 (3.3)            | 1,394 (10.3)               | 634 (17.0)           | 571 (12.2)           | 187 (3.8)            |                  |        |
| Bone cancer                                 | 1,942 (7.3)                | 554 (9.0)            | 750 (7.4)            | 638 (6.1)            | 1,061 (7.8)                | 313 (8.4)            | 390 (8.3)            | 346 (7.0)            |                  |        |
| Osteosarcoma                                | 1,187 (4.4)                | 354 (5.7)            | 467 (4.6)            | 366 (3.5)            | 616 (4.6)                  | 186 (5.0)            | 224 (4.8)            | 206 (4.2)            |                  |        |
| Ewing sarcoma                               | 702 (2.6)                  | 197 (3.2)            | 274 (2.7)            | 231 (2.2)            | 319 (2.4)                  | 84 (2.3)             | 116 (2.5)            | 119 (2.4)            |                  |        |
| Other                                       | 53 (0.2)                   | 3 (0.1)              | 9 (0.1)              | 41 (0.4)             | 114 (0.9)                  | 43 (1.2)             | 50 (1.1)             | 21 (0.4)             |                  |        |
| <b>Mortality</b>                            |                            |                      |                      |                      |                            |                      |                      |                      |                  |        |
| Alive                                       | 20,295 (87.6)              | 4,706 (76.0)         | 8,171 (87.7)         | 7,418 (94.5)         | 9,948 (82.7)               | 2,681 (71.8)         | 3,582 (82.2)         | 3,526 (90.8)         |                  | <0.001 |
| Dead                                        | 3,167 (12.4)               | 1,487 (24.0)         | 1,192 (12.3)         | 488 (5.5)            | 2,239 (17.4)               | 1,054 (28.2)         | 785 (17.8)           | 392 (9.2)            |                  |        |
| Cardiac death at 15 years from cohort entry | 84 (2.6)                   | 32 (2.2)             | 37 (3.0)             | 15 (3.1)             | 63 (2.8)                   | 26 (2.5)             | 25 (3.3)             | 12 (2.7)             | 0.69             |        |

---

\* Sampling weights were applied for all percentages, means, and medians to account for under sampling of acute lymphoblastic leukemia survivors (1987-1999), using a weight of 1.21 for those aged 0 or 11-20 years at diagnosis and a weight of 3.63 for those aged 1-10 years.

‡ p-value comparing overall participants to non-participants

\*\* Acute lymphoblastic leukemia, † Acute myelogenous leukemia, † Hodgkin lymphoma, ‡ non-Hodgkin lymphoma

**Supplemental Table 3: Anthracycline exposure by diagnosis and treatment era**

| Diagnosis            | Anthracycline <sup>  </sup><br>(mg/m <sup>2</sup> ) | Overall cohort | 1970-1979    | 1980-1989    | 1990-1999    |
|----------------------|-----------------------------------------------------|----------------|--------------|--------------|--------------|
|                      |                                                     | N=23,462       | N=6,193      | N=9,363      | N=7,906      |
|                      |                                                     | N (%)          | N (%)        | N (%)        | N (%)        |
| Leukemia             | None                                                | 2,552 (32.6)   | 1,096 (65.7) | 1,211 (38.6) | 245 (14.8)   |
|                      | < 250                                               | 3,058 (57.4)   | 307 (18.4)   | 1,323 (50.6) | 1,428 (78.3) |
|                      | ≥ 250                                               | 757 (9.9)      | 265 (15.9)   | 322 (10.9)   | 170 (5.9)    |
| CNS tumors           | None                                                | 3,890 (99.3)   | 643 (99.6)   | 1,352 (99.6) | 1,895 (99.0) |
|                      | < 250                                               | 11 (0.3)       | 1 (0.2)      | 3 (0.2)      | 7 (0.4)      |
|                      | ≥ 250                                               | 16 (0.4)       | 1 (0.2)      | 3 (0.2)      | 12 (0.6)     |
| Hodgkin Lymphoma     | None                                                | 1,413 (53.9)   | 824 (89.0)   | 507 (56.3)   | 82 (10.3)    |
|                      | < 250                                               | 890 (34.0)     | 30 (3.2)     | 263 (29.2)   | 597 (75.2)   |
|                      | ≥ 250                                               | 318 (12.1)     | 72 (7.8)     | 131 (14.5)   | 115 (14.5)   |
| Non-Hodgkin Lymphoma | None                                                | 472 (28.7)     | 205 (58.9)   | 191 (29.6)   | 76 (11.6)    |
|                      | < 250                                               | 887 (53.9)     | 96 (27.6)    | 307 (47.6)   | 484 (74.2)   |
|                      | ≥ 250                                               | 287 (17.4)     | 47 (13.5)    | 147 (22.8)   | 93 (14.2)    |
| Kidney               | None                                                | 1,054 (55.7)   | 327 (74.8)   | 392 (51.9)   | 335 (47.9)   |
|                      | < 250                                               | 506 (26.8)     | 46 (10.5)    | 172 (22.8)   | 288 (41.2)   |
|                      | ≥ 250                                               | 331 (17.5)     | 64 (14.7)    | 191 (25.3)   | 76 (10.9)    |
| Neuroblastoma        | None                                                | 979 (60.3)     | 319 (85.1)   | 361 (61.7)   | 299 (45.1)   |
|                      | < 250                                               | 512 (31.6)     | 18 (4.8)     | 176 (30.1)   | 318 (48.0)   |
|                      | ≥ 250                                               | 132 (8.1)      | 38 (10.1)    | 48 (8.2)     | 46 (6.9)     |
| Soft tissue sarcoma  | None                                                | 594 (57.5)     | 192 (62.1)   | 172 (43.5)   | 230 (69.7)   |
|                      | < 250                                               | 113 (10.9)     | 39 (12.6)    | 33 (8.4)     | 41 (12.4)    |
|                      | ≥ 250                                               | 327 (31.6)     | 78 (25.2)    | 190 (48.1)   | 59 (17.9)    |
| Bone cancer          | None                                                | 191 (11.6)     | 104 (24.0)   | 62 (9.9)     | 25 (4.2)     |
|                      | < 250                                               | 213 (12.9)     | 44 (10.2)    | 83 (13.3)    | 86 (14.5)    |
|                      | ≥ 250                                               | 1247 (75.5)    | 285 (65.8)   | 479 (76.8)   | 483 (81.3)   |
| All Survivors        | None                                                | 11,145 (49.0)  | 3,710 (72.2) | 4,248 (50.0) | 3,187 (36.0) |

|  |       |              |            |              |              |
|--|-------|--------------|------------|--------------|--------------|
|  | < 250 | 6,190 (36.0) | 581 (11.3) | 2,360 (32.2) | 3,249 (52.1) |
|  | ≥ 250 | 3,415 (15.0) | 850 (16.5) | 1,511 (17.8) | 1,054 (11.9) |

|| doxorubicin equivalents

**Supplemental Table 4: Mean heart radiation exposure by diagnosis and treatment era**

| Diagnosis            | Mean Heart RT dose (Gy) | Overall cohort<br>N=23,462 | 1970-1979<br>N=6,193 | 1980-1989<br>N=9,363 | 1990-1999<br>N=7,906 |
|----------------------|-------------------------|----------------------------|----------------------|----------------------|----------------------|
|                      |                         | N (%)                      | N (%)                | N (%)                | N (%)                |
| Leukemia             | None                    | 2,742 (48.4)               | 339 (19.7)           | 1,303 (47.0)         | 1,100 (61.2)         |
|                      | < 15                    | 3,287 (43.4)               | 1,271 (73.9)         | 1,520 (48.0)         | 496 (27.0)           |
|                      | 15 to < 35              | 387 (7.6)                  | 109 (6.3)            | 87 (4.6)             | 191 (10.6)           |
|                      | ≥ 35                    | 32 (0.7)                   | 1 (0.1)              | 6 (0.4)              | 25 (1.2)             |
| CNS tumors           | None                    | 1,789 (46.5)               | 170 (27.5)           | 531 (40.3)           | 1,088 (57.0)         |
|                      | < 15                    | 1,349 (35.1)               | 314 (50.8)           | 486 (36.9)           | 549 (28.8)           |
|                      | 15 to < 35              | 672 (17.5)                 | 133 (21.5)           | 293 (22.2)           | 246 (12.9)           |
|                      | ≥ 35                    | 34 (0.9)                   | 1 (0.2)              | 8 (0.6)              | 25 (1.3)             |
| Hodgkin Lymphoma     | None                    | 621 (23.6)                 | 52 (5.6)             | 159 (17.4)           | 410 (52.0)           |
|                      | < 15                    | 499 (18.9)                 | 119 (12.8)           | 163 (17.8)           | 217 (27.5)           |
|                      | 15 to < 35              | 606 (23.0)                 | 202 (21.7)           | 264 (28.8)           | 140 (17.8)           |
|                      | ≥ 35                    | 909 (34.5)                 | 558 (59.9)           | 330 (36.0)           | 21 (2.7)             |
| Non-Hodgkin Lymphoma | None                    | 809 (47.2)                 | 71 (19.1)            | 317 (47.3)           | 421 (62.8)           |
|                      | < 15                    | 672 (39.3)                 | 225 (60.7)           | 270 (40.3)           | 177 (26.4)           |
|                      | 15 to < 35              | 179 (10.5)                 | 53 (14.3)            | 65 (9.7)             | 61 (9.1)             |
|                      | ≥ 35                    | 51 (3.0)                   | 22 (5.9)             | 18 (2.7)             | 11 (1.6)             |
| Kidney               | None                    | 831 (45.5)                 | 102 (22.9)           | 371 (49.6)           | 358 (56.5)           |
|                      | < 15                    | 826 (45.2)                 | 287 (64.4)           | 328 (43.9)           | 211 (33.3)           |
|                      | 15 to < 35              | 162 (8.9)                  | 57 (12.8)            | 48 (6.4)             | 57 (9.0)             |
|                      | ≥ 35                    | 9 (0.5)                    | 0 (0.0)              | 1 (0.1)              | 8 (1.3)              |
| Neuroblastoma        | None                    | 965 (58.2)                 | 145 (37.9)           | 387 (65.6)           | 433 (63.30)          |
|                      | < 15                    | 523 (31.6)                 | 182 (47.5)           | 155 (26.3)           | 186 (27.2)           |
|                      | 15 to < 35              | 157 (9.5)                  | 54 (14.1)            | 45 (7.6)             | 58 (8.5)             |
|                      | ≥ 35                    | 12 (0.7)                   | 2 (0.5)              | 3 (0.5)              | 7 (1.0)              |
| Soft tissue sarcoma  | None                    | 341 (33.5)                 | 60 (19.4)            | 117 (29.9)           | 164 (51.6)           |
|                      | < 15                    | 595 (58.4)                 | 228 (73.8)           | 248 (63.3)           | 119 (37.4)           |
|                      | 15 to < 35              | 71 (7.0)                   | 16 (5.2)             | 25 (6.4)             | 30 (9.4)             |
|                      | ≥ 35                    | 12 (1.2)                   | 5 (1.6)              | 2 (0.5)              | 5 (1.6)              |
| Bone cancer          | None                    | 1,136 (65.3)               | 280 (59.2)           | 446 (67.0)           | 410 (68.1)           |
|                      | < 15                    | 448 (25.7)                 | 138 (29.2)           | 173 (26.0)           | 137 (22.8)           |
|                      | 15 to < 35              | 142 (8.2)                  | 51 (10.8)            | 39 (5.9)             | 52 (8.6)             |

|               |            |              |              |              |              |
|---------------|------------|--------------|--------------|--------------|--------------|
|               | ≥ 35       | 15 (0.9)     | 4 (0.9)      | 8 (1.2)      | 3 (0.5)      |
| All Survivors | None       | 9,234 (46.3) | 1,219 (23.2) | 3,631 (45.2) | 4,384 (59.7) |
|               | < 15       | 8,199 (37.8) | 2,764 (52.6) | 3,343 (39.9) | 2,092 (27.9) |
|               | 15 to < 35 | 2,376 (11.3) | 675 (12.9)   | 866 (10.6)   | 835 (11.1)   |
|               | ≥ 35       | 1,074 (4.6)  | 593 (11.3)   | 376 (4.3)    | 105 (1.3)    |

**Supplemental Table 5. Cumulative Incidence of cardiac outcomes at 20 years from diagnosis by cancer diagnosis and treatment decade**

| Diagnosis            | Decade    | Heart Failure                        | Coronary Artery Disease              | Valvular Heart Disease               | Pericardial Disease                  | Arrhythmia                           |
|----------------------|-----------|--------------------------------------|--------------------------------------|--------------------------------------|--------------------------------------|--------------------------------------|
|                      |           | Cumulative incidence (%)<br>(95% CI) |
| Leukemia             | 1970-1979 | 0.39 (0.17 to 1.91)                  | 0.27 (0.07 to 1.06)                  | 0.03 (0.01 to 0.49)                  | 0.00                                 | 0.12 (0.04 to 0.37)                  |
|                      | 1980-1989 | 0.31 (0.12 to 0.77)                  | 0.19 (0.05 to 0.68)                  | 0.02 (0.00 to 33.4)                  | 0.00                                 | 0.08 (0.02 to 0.29)                  |
|                      | 1990-1999 | 0.40 (0.21 to 0.77)                  | 0.23 (0.05 to 1.13)                  | 0.09 (0.02 to 0.51)                  | 0.00                                 | 0.05 (0.01 to 0.21)                  |
| CNS tumors           | 1970-1979 | 0.15 (0.03 to 0.80)                  | 0.18 (0.05 to 0.67)                  | 0.00                                 | 0.00                                 | 0.00                                 |
|                      | 1980-1989 | 0.08 (0.02 to 0.28)                  | 0.15 (0.05 to 0.46)                  | 0.00                                 | 0.00                                 | 0.00                                 |
|                      | 1990-1999 | 0.20 (0.09 to 0.44)                  | 0.11 (0.03 to 0.41)                  | 0.00                                 | 0.00                                 | 0.02 (0.01 to 0.04)                  |
| Hodgkin Lymphoma     | 1970-1979 | 1.13 (0.69 to 1.87)                  | 0.99 (0.67 to 1.48)                  | 0.17 (0.07 to 0.43)                  | 0.02 (0.00 to 0.25)                  | 0.16 (0.05 to 0.46)                  |
|                      | 1980-1989 | 1.44 (0.93 to 2.24)                  | 0.75 (0.46 to 1.21)                  | 0.26 (0.09 to 0.75)                  | 0.01 (0.00 to 0.13)                  | 0.20 (0.07 to 0.60)                  |
|                      | 1990-1999 | 0.93 (0.51 to 1.70)                  | 0.42 (0.20 to 0.88)                  | 0.07 (0.01 to 0.50)                  | 0.02 (0.00 to 0.85)                  | 0.27 (0.10 to 0.72)                  |
| Non-Hodgkin Lymphoma | 1970-1979 | 1.30 (0.74 to 2.29)                  | 0.44 (0.14 to 1.40)                  | 0.00                                 | 0.06 (0.01 to 0.55)                  | 0.04 (0.00 to 0.64)                  |
|                      | 1980-1989 | 1.22 (0.65 to 2.28)                  | 0.35 (0.15 to 0.82)                  | 0.00                                 | 0.02 (0.00 to 0.33)                  | 0.12 (0.03 to 0.57)                  |
|                      | 1990-1999 | 0.50 (0.21 to 1.12)                  | 0.36 (0.12 to 1.07)                  | 0.00                                 | 0.03 (0.00 to 0.36)                  | 0.12 (0.02 to 0.62)                  |
| Kidney               | 1970-1979 | 0.69 (0.28 to 1.70)                  | 0.00                                 | 0.26 (0.05 to 1.28)                  | 0.00                                 | 0.00                                 |
|                      | 1980-1989 | 0.86 (0.45 to 1.64)                  | 0.00                                 | 0.17 (0.04 to 0.79)                  | 0.00                                 | 0.00                                 |
|                      | 1990-1999 | 0.26 (0.07 to 0.94)                  | 0.00                                 | 0.13 (0.02 to 0.99)                  | 0.00                                 | 0.00                                 |
| Neuroblastoma        | 1970-1979 | 0.21 (0.06 to 0.75)                  | 0.25 (0.07 to 0.87)                  | 0.00                                 | 0.00                                 | 0.00                                 |
|                      | 1980-1989 | 0.63 (0.31 to 1.26)                  | 0.16 (0.03 to 0.72)                  | 0.00                                 | 0.00                                 | 0.00                                 |
|                      | 1990-1999 | 1.13 (0.57 to 2.24)                  | 0.12 (0.02 to 0.74)                  | 0.00                                 | 0.00                                 | 0.00                                 |
| Soft tissue sarcoma  | 1970-1979 | 0.82 (0.33 to 2.02)                  | 0.08 (0.01 to 1.19)                  | 0.00                                 | 0.01 (0.00 to 0.09)                  | 0.01 (0.00 to 0.07)                  |
|                      | 1980-1989 | 0.92 (0.38 to 2.23)                  | 0.04 (0.01 to 0.37)                  | 0.00                                 | 0.01 (0.00 to 0.06)                  | 0.01 (0.00 to 0.04)                  |
|                      | 1990-1999 | 0.51 (0.14 to 1.84)                  | 0.00                                 | 0.00                                 | 0.00                                 | 0.00                                 |
| Bone cancer          | 1970-1979 | 1.37 (0.77 to 2.43)                  | 0.80 (0.36 to 1.80)                  | 0.00                                 | 0.00                                 | 0.07 (0.01 to 0.42)                  |

|                      |           |                     |                     |                     |                     |                     |
|----------------------|-----------|---------------------|---------------------|---------------------|---------------------|---------------------|
|                      | 1980-1989 | 2.33 (1.49 to 3.65) | 0.76 (0.40 to 1.45) | 0.03 (0.00 to 0.33) | 0.01 (0.00 to 0.02) | 0.20 (0.06 to 0.64) |
|                      | 1990-1999 | 1.08 (0.55 to 2.12) | 0.44 (0.16 to 1.19) | 0.02 (0.00 to 0.30) | 0.02 (0.01 to 0.08) | 0.15 (0.04 to 0.51) |
| All Cancer Survivors | 1970-1979 | 0.69 (0.52 to 0.93) | 0.38 (0.26 to 0.54) | 0.06 (0.03 to 0.13) | 0.04 (0.01 to 0.16) | 0.08 (0.04 to 0.15) |
|                      | 1980-1989 | 0.74 (0.57 to 0.95) | 0.24 (0.16 to 0.35) | 0.06 (0.03 to 0.13) | 0.02 (0.00 to 0.15) | 0.09 (0.05 to 0.17) |
|                      | 1990-1999 | 0.54 (0.38 to 0.75) | 0.19 (0.12 to 0.33) | 0.05 (0.02 to 0.12) | 0.03 (0.01 to 0.08) | 0.13 (0.08 to 0.23) |



**Supplemental Table 6. Prevalence of Grade 3-5 cardiac conditions at 20 years from diagnosis by treatment decade in survivors and siblings**

|           |        | Heart Failure | Coronary Artery Disease | Valvular Heart Disease | Pericardial Disease | Arrhythmia |
|-----------|--------|---------------|-------------------------|------------------------|---------------------|------------|
|           |        | Grade 3-5     | Grade 3-5               | Grade 3-5              | Grade 3-5           | Grade 3-5  |
| Diagnosis | Decade | N (%)         | N (%)                   | N (%)                  | N (%)               | N (%)      |

|                      |           |            |           |           |          |           |
|----------------------|-----------|------------|-----------|-----------|----------|-----------|
| Leukemia             | 1970-1979 | 13 (0.64)  | 13 (0.64) | 1 (0.05)  | 0 (0.00) | 5 (0.25)  |
|                      | 1980-1989 | 21 (0.52)  | 14 (0.42) | 1 (0.02)  | 1 (0.02) | 6 (0.15)  |
|                      | 1990-1999 | 16 (0.54)  | 10 (0.35) | 2 (0.10)  | 0 (0.00) | 3 (0.07)  |
| CNS tumors           | 1970-1979 | 2 (0.27)   | 3 (0.41)  | 0 (0.00)  | 0 (0.00) | 0 (0.00)  |
|                      | 1980-1989 | 2 (0.13)   | 5 (0.33)  | 1 (0.07)  | 1 (0.07) | 0 (0.00)  |
|                      | 1990-1999 | 5 (0.25)   | 4 (0.20)  | 0 (0.00)  | 0 (0.00) | 5 (0.25)  |
| Hodgkin lymphoma     | 1970-1979 | 24 (2.20)  | 48 (4.39) | 3 (0.73)  | 4 (0.37) | 6 (0.55)  |
|                      | 1980-1989 | 27 (2.56)  | 31 (2.94) | 11 (1.04) | 2 (0.19) | 7 (0.66)  |
|                      | 1990-1999 | 10 (1.19)  | 6 (0.72)  | 1 (0.12)  | 1 (0.12) | 4 (0.48)  |
| Non-Hodgkin lymphoma | 1970-1979 | 11 (2.43)  | 4 (0.88)  | 0 (0.00)  | 2 (0.44) | 1 (0.22)  |
|                      | 1980-1989 | 17 (2.22)  | 5 (0.65)  | 1 (0.13)  | 1 (0.13) | 5 (0.65)  |
|                      | 1990-1999 | 5 (0.71)   | 3 (0.43)  | 0 (0.00)  | 1 (0.14) | 2 (0.29)  |
| Kidney tumor         | 1970-1979 | 6 (1.13)   | 2 (0.38)  | 2 (0.38)  | 2 (0.38) | 0 (0.00)  |
|                      | 1980-1989 | 11 (1.26)  | 0 (0.00)  | 2 (0.23)  | 0 (0.00) | 0 (0.00)  |
|                      | 1990-1999 | 2 (0.27)   | 1 (0.14)  | 1 (0.14)  | 0 (0.00) | 2 (0.27)  |
| Neuroblastoma        | 1970-1979 | 2 (0.45)   | 3 (0.68)  | 0 (0.00)  | 0 (0.00) | 0 (0.00)  |
|                      | 1980-1989 | 8 (1.20)   | 3 (0.45)  | 0 (0.00)  | 0 (0.00) | 2 (0.30)  |
|                      | 1990-1999 | 10 (1.40)  | 2 (0.28)  | 0 (0.00)  | 0 (0.00) | 3 (0.42)  |
| Soft tissue sarcoma  | 1970-1979 | 8 (2.20)   | 3 (0.82)  | 1 (0.55)  | 1 (0.27) | 3 (0.82)  |
|                      | 1980-1989 | 10 (2.26)  | 2 (0.45)  | 0 (0.00)  | 1 (0.23) | 2 (0.45)  |
|                      | 1990-1999 | 3 (0.87)   | 0 (0.00)  | 0 (0.00)  | 0 (0.00) | 0 (0.00)  |
| Bone cancer          | 1970-1979 | 16 (2.89)  | 9 (1.62)  | 0 (0.00)  | 0 (0.00) | 2 (0.36)  |
|                      | 1980-1989 | 32 (4.27)  | 11 (1.47) | 2 (0.27)  | 1 (0.13) | 7 (0.93)  |
|                      | 1990-1999 | 10 (1.57)  | 4 (0.63)  | 1 (0.16)  | 4 (0.63) | 3 (0.47)  |
| All Cancer Survivors | 1970-1979 | 82 (1.32)  | 85 (1.37) | 13 (0.21) | 9 (0.15) | 17 (0.27) |
|                      | 1980-1989 | 128 (1.27) | 71 (0.73) | 18 (0.18) | 7 (0.07) | 29 (0.29) |
|                      | 1990-1999 | 61 (0.66)  | 30 (0.34) | 5 (0.07)  | 6 (0.06) | 22 (0.21) |
| Siblings             | 1970-1979 | 1 (0.06)   | 0 (0.00)  | 0 (0.00)  | 0 (0.00) | 2 (0.11)  |
|                      | 1980-1989 | 0 (0.00)   | 4 (0.17)  | 2 (0.08)  | 0 (0.00) | 1 (0.04)  |

|           |          |          |          |          |          |
|-----------|----------|----------|----------|----------|----------|
| 1990-1999 | 0 (0.00) | 0 (0.00) | 2 (0.25) | 0 (0.00) | 1 (0.12) |
|-----------|----------|----------|----------|----------|----------|

**Supplemental Table 7. Relative rates of cardiac conditions, per five-year treatment eras, by diagnosis, with and without adjustment for cardio-toxic exposures\***

| Diagnosis            | Adjusted for cardio-toxic therapy | Heart Failure      | Coronary Artery Disease | Valvular Heart Disease | Pericardial Disease | Arrhythmia         |
|----------------------|-----------------------------------|--------------------|-------------------------|------------------------|---------------------|--------------------|
|                      |                                   | HR 95% CI          | HR 95% CI               | HR 95% CI              | HR 95% CI           | HR 95% CI          |
| Leukemia             | No                                | 1.05 (0.69 – 1.60) | 0.92 (0.65 – 1.31)      | 2.12 (0.49 – 9.24)     | N/E                 | 0.82 (0.57 – 1.19) |
|                      | Yes                               | 0.99 (0.68 – 1.43) | 0.89 (0.58 – 1.37)      | 2.27 (0.62 – 8.24)     | N/E                 | 0.83 (0.53 – 1.31) |
| CNS Tumors           | No                                | 1.05 (0.69 – 1.60) | 0.82 (0.57 – 1.18)      | N/E                    | N/E                 | 2.23 (1.49 – 3.34) |
|                      | Yes                               | 1.12 (0.58 – 2.15) | 0.85 (0.58 – 1.25)      | N/E                    | N/E                 | 2.20 (1.45 – 3.33) |
| Hodgkin lymphoma     | No                                | 0.98 (0.81 – 1.19) | 0.77 (0.66 – 0.89)      | 0.92 (0.72 – 1.18)     | 0.83 (0.42 – 1.63)  | 1.09 (0.85 – 1.41) |
|                      | Yes                               | 0.90 (0.74 – 1.10) | 0.87 (0.69 – 1.10)      | 1.13 (0.83 – 1.55)     | 0.70 (0.42 – 1.17)  | 1.04 (0.69 – 1.56) |
| Non-Hodgkin lymphoma | No                                | 0.92 (0.77 – 1.09) | 1.16 (0.79 – 1.71)      | N/E                    | 0.90 (0.52 – 1.58)  | 1.40 (0.63 – 3.12) |
|                      | Yes                               | 0.84 (0.65 – 1.09) | 1.05 (0.65 – 1.71)      | N/E                    | 1.04 (0.44 – 2.48)  | 1.57 (0.54 – 4.57) |
| Kidney tumor         | No                                | 0.83 (0.59 – 1.17) | 0.75 (0.25 – 2.21)      | 0.85 (0.49 – 1.49)     | N/E                 | 3.86 (1.69 – 8.78) |
|                      | Yes                               | 0.81 (0.53 – 1.22) | N/E                     | 0.74 (0.39 – 1.39)     | N/E                 | N/E                |
| Neuroblastoma        | No                                | 1.51 (1.26 – 1.82) | 0.70 (0.34 – 1.43)      | N/E                    | N/E                 | 3.43 (1.83 – 6.41) |
|                      | Yes                               | 1.41 (1.12 – 1.78) | 0.82 (0.52 – 1.31)      | N/E                    | N/E                 | 2.91 (1.73 – 4.88) |
| Soft tissue sarcoma  | No                                | 1.02 (0.76 – 1.37) | 0.51 (0.24 – 1.07)      | N/E                    | N/E                 | 0.56 (0.31 – 1.01) |
|                      | Yes                               | 1.03 (0.71 – 1.49) | 0.39 (0.14 – 1.08)      | N/E                    | N/E                 | 0.52 (0.23 – 1.17) |
| Bone cancer          | No                                | 0.98 (0.83 – 1.16) | 0.91 (0.66 – 1.25)      | 1.43 (0.80 – 2.57)     | 2.78 (1.81 – 4.28)  | 1.47 (0.94 – 2.29) |
|                      | Yes                               | 0.91 (0.75 – 1.10) | 0.86 (0.60 – 1.23)      | N/E                    | 2.86 (1.72 – 4.78)  | 1.45 (0.86 – 2.43) |
| All Survivors        | No                                | 0.97 (0.88 – 1.06) | 0.80 (0.71 – 0.91)      | 0.97 (0.74 – 1.28)     | 0.98 (0.68 – 1.40)  | 1.17 (0.99 – 1.38) |
|                      | Yes                               | 0.94 (0.83 – 1.05) | 0.87 (0.74 – 1.03)      | 1.13 (0.83 – 1.53)     | 0.99 (0.66 – 1.50)  | 1.19 (0.99 – 1.43) |

\*Estimates adjusted for age at diagnosis, sex, race, BMI, smoking, exercise intensity (metabolic hours/week), and modifiable risk factors (diabetes, dyslipidemia, hypertension). N/E=not estimated.
